# Supplementary material for: Comparative Genomics Analysis of Habitat Adaptation by Lactobacillus kefiranofaciens
Source: MDPI journal article supplement (doi:10.3390/foods12081606), 2023-04-10
Supplement: s1 [file s1]

## Supplementary

**Table S1.** Genomic characteristics of 73 strains of *L. kefiranofaciens*.

| Strains  | Genome Size (Mbp) | GC Content (%) | CDS  | rRNA | tRNA |
|----------|-------------------|----------------|------|------|------|
| C5301-1  | 2.05              | 37.49          | 2151 | 3    | 52   |
| ELS10-4  | 2.04              | 37.48          | 2165 | 3    | 53   |
| ELS2-1   | 2.00              | 37.43          | 2097 | 3    | 52   |
| ELS34-1  | 2.01              | 37.5           | 2117 | 4    | 53   |
| ELS36-1  | 2.01              | 37.5           | 2113 | 3    | 52   |
| ELS7-3   | 1.86              | 37.61          | 1964 | 0    | 50   |
| F3301    | 2.01              | 37.78          | 2154 | 3    | 58   |
| HM24-4   | 2.01              | 37.36          | 2113 | 3    | 52   |
| KG12-2   | 2.25              | 37.15          | 2359 | 3    | 43   |
| MA8-10   | 2.26              | 37.21          | 2359 | 3    | 53   |
| MA9-9    | 1.97              | 37.67          | 2107 | 4    | 50   |
| MCG7     | 2.10              | 37.39          | 2206 | 3    | 57   |
| MGR1-25  | 2.03              | 37.59          | 2136 | 3    | 52   |
| MGR1-59  | 2.28              | 37.13          | 2380 | 3    | 53   |
| MH1-12-2 | 1.99              | 37.55          | 2089 | 3    | 55   |
| MH1-2    | 1.99              | 37.51          | 2092 | 3    | 52   |
| MH1-6    | 1.92              | 37.67          | 2026 | 3    | 52   |
| MH1-7    | 2.01              | 37.52          | 2098 | 3    | 56   |
| MH1-8    | 2.20              | 37.31          | 2307 | 3    | 56   |
| MH2-1    | 2.02              | 37.6           | 2318 | 3    | 52   |
| MH2-2    | 2.21              | 37.3           | 2318 | 3    | 52   |
| MH2-3-1  | 2.06              | 37.6           | 2188 | 3    | 56   |
| MH2-3-2  | 2.05              | 37.61          | 2187 | 3    | 52   |
| MH2-6-1  | 1.94              | 37.54          | 2015 | 3    | 52   |
| MH2-6-2  | 1.94              | 37.55          | 2014 | 3    | 52   |
| MH2-7-1  | 2.06              | 37.61          | 2187 | 3    | 56   |

| Strains   | Genome Size (Mbp) | GC Content (%) | CDS  | rRNA | tRNA |
|-----------|-------------------|----------------|------|------|------|
| MH2-7-2   | 2.06              | 37.6           | 2187 | 3    | 53   |
| MH4-5     | 2.09              | 37.37          | 2195 | 3    | 53   |
| MH4-6     | 2.04              | 37.47          | 2160 | 3    | 53   |
| MH4-8-1   | 1.93              | 37.6           | 2019 | 3    | 56   |
| MH4-8-2   | 1.92              | 37.6           | 2016 | 3    | 53   |
| MQ1-1     | 1.97              | 37.5           | 2068 | 3    | 52   |
| MQ1-3-2   | 1.97              | 37.59          | 2106 | 3    | 53   |
| MQ1-3-3   | 1.96              | 37.59          | 2099 | 3    | 50   |
| MQ1-7-1-1 | 1.97              | 37.56          | 2057 | 3    | 52   |
| MQ2-1     | 1.99              | 37.61          | 2091 | 3    | 52   |
| MQ2-2     | 2.01              | 37.52          | 2100 | 3    | 56   |
| MQ2-4     | 2.16              | 37.22          | 2230 | 3    | 50   |
| MQ2-5     | 2.00              | 37.5           | 2081 | 3    | 53   |
| MQ2-7-1   | 1.99              | 37.5           | 2072 | 4    | 52   |
| MQ2-7-2   | 2.01              | 37.51          | 2082 | 3    | 56   |
| MZ1-2     | 2.05              | 37.46          | 2169 | 3    | 53   |
| MZ1-6-1   | 2.08              | 37.37          | 2175 | 3    | 53   |
| MZ1-6-2   | 2.09              | 37.38          | 2188 | 3    | 53   |
| MZ1-7     | 1.98              | 37.63          | 2093 | 3    | 56   |
| NM17-2    | 2.20              | 37.35          | 2295 | 3    | 52   |
| Q6-4      | 2.02              | 37.42          | 2119 | 3    | 51   |
| RH2-1     | 2.06              | 37.61          | 2184 | 3    | 55   |
| RH2-2     | 2.23              | 37.33          | 2339 | 3    | 56   |
| RH2-3     | 2.19              | 37.32          | 2298 | 3    | 56   |
| RH2-4     | 2.27              | 37.13          | 2350 | 3    | 49   |
| RQ3-1-1   | 2.06              | 37.61          | 2188 | 3    | 55   |
| RQ3-3     | 2.26              | 37.13          | 2365 | 3    | 47   |
| RQ3-4     | 2.06              | 37.6           | 2187 | 3    | 55   |

| Strains  | Genome Size (Mbp) | GC Content (%) | CDS  | rRNA | tRNA |
|----------|-------------------|----------------|------|------|------|
| RQ3-5    | 2.01              | 37.65          | 2113 | 3    | 54   |
| RQ3-6    | 2.28              | 37.13          | 2373 | 3    | 52   |
| RQ3-7    | 2.06              | 37.61          | 2189 | 3    | 55   |
| Ru15-4   | 2.30              | 37.05          | 2386 | 2    | 56   |
| Ru17-11  | 1.98              | 37.51          | 2086 | 3    | 56   |
| Ru17-3-1 | 1.93              | 37.52          | 2009 | 2    | 57   |
| Ru17-3-2 | 1.98              | 37.54          | 2051 | 3    | 53   |
| RU19-3   | 1.97              | 37.62          | 2071 | 3    | 52   |
| SL1-1-1  | 2.02              | 37.63          | 2134 | 3    | 56   |
| SL1-1-2  | 2.00              | 37.63          | 2116 | 3    | 47   |
| SL1-2-1  | 1.97              | 37.5           | 2079 | 3    | 52   |
| SL1-4-1  | 1.99              | 37.56          | 2098 | 4    | 52   |
| SL1-4-3  | 1.99              | 37.56          | 2093 | 3    | 51   |
| SL2-7    | 1.94              | 37.62          | 2042 | 3    | 58   |
| SL4-6-1  | 1.95              | 37.55          | 2044 | 2    | 52   |
| SMN2-1   | 1.95              | 37.59          | 2046 | 5    | 56   |
| SMN2-2   | 1.98              | 37.56          | 2068 | 3    | 54   |
| XJ56-4-1 | 2.19              | 37.31          | 2293 | 4    | 52   |
| Z2-4     | 2.03              | 37.65          | 2145 | 3    | 52   |

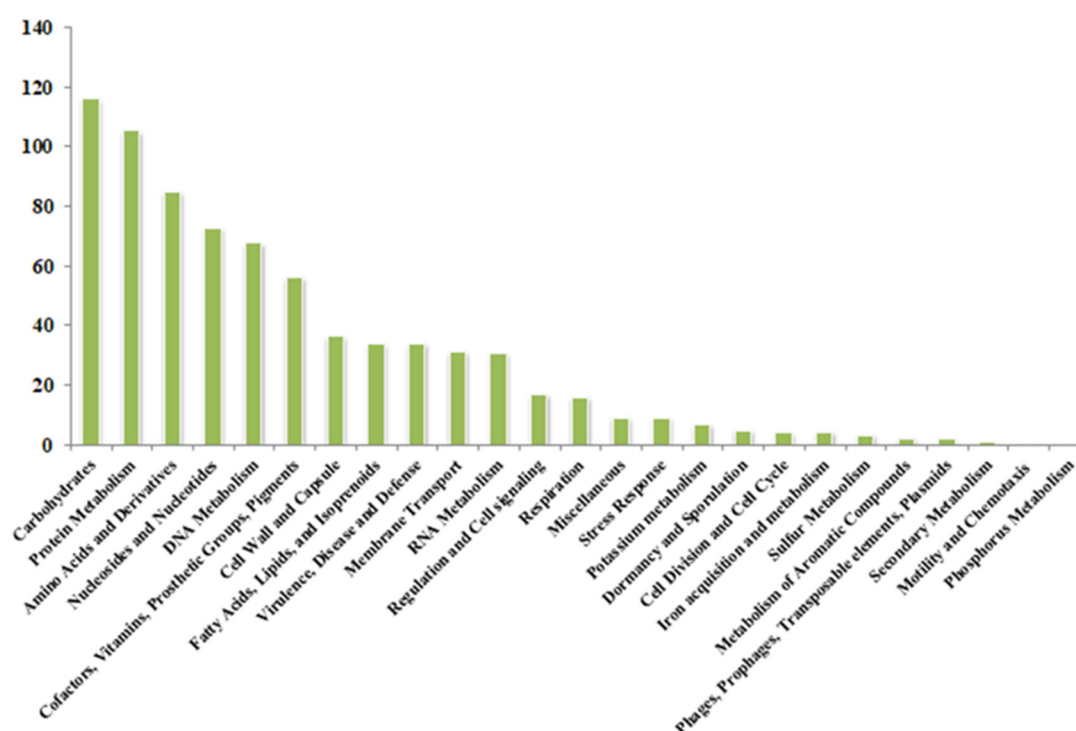

**Figure S1.** RAST annotation results for 82 strains of *L. kefiranofaciens*.

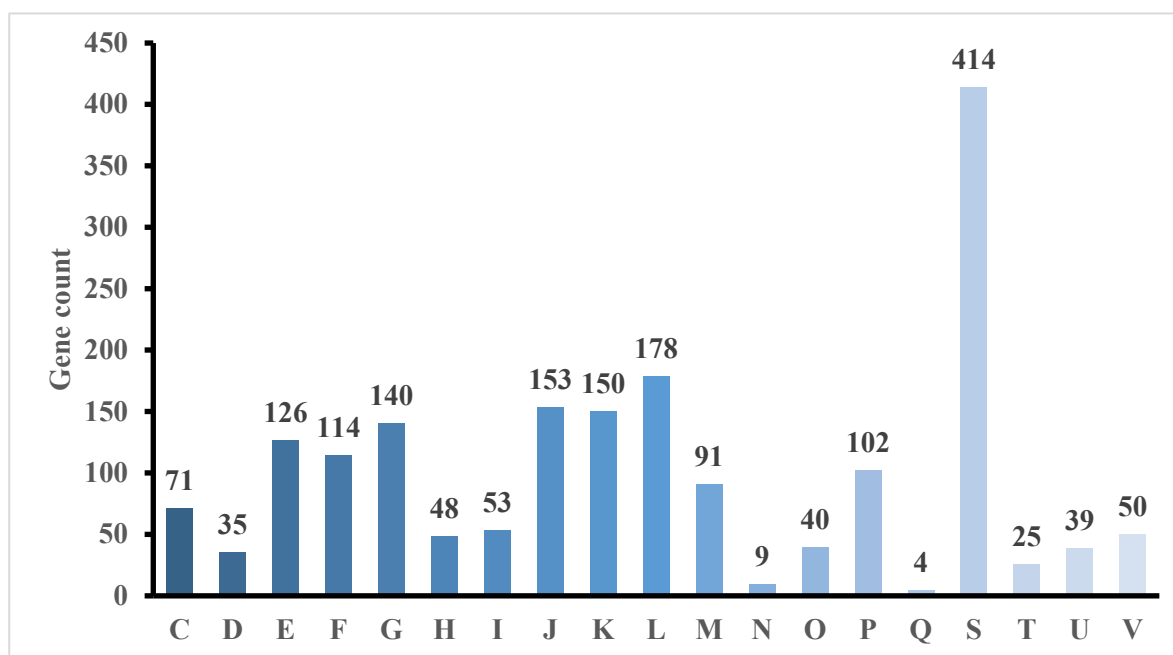

**Figure S2.** COG annotation results of 82 strains of *L. kefiranofaciens*.

C: Energy production and conversion, D: Cell cycle control, cell division, chromosome Partitioning, E: Amino acid transport and metabolism, F: Nucleotide transport and metabolism, G: Carbohydrate transport and metabolism, H: Coenzyme transport and metabolism, I: Lipid transport and metabolism, J: Translation, ribosomal structure and biogenesis, K: Transcription, L: Replication, recombination and repair, M: Cell wall/membrane/envelope biogenesis, N: Cell motility, O: Posttranslational modification, protein turnover, P: Inorganic ion transport and metabolism, Q: Secondary metabolites biosynthesis, transport and catabolism, T: Signal transduction mechanisms, U: Intracellular trafficking, secretion, and vesicular, V: Defense

mechanisms, S: Function unknown.

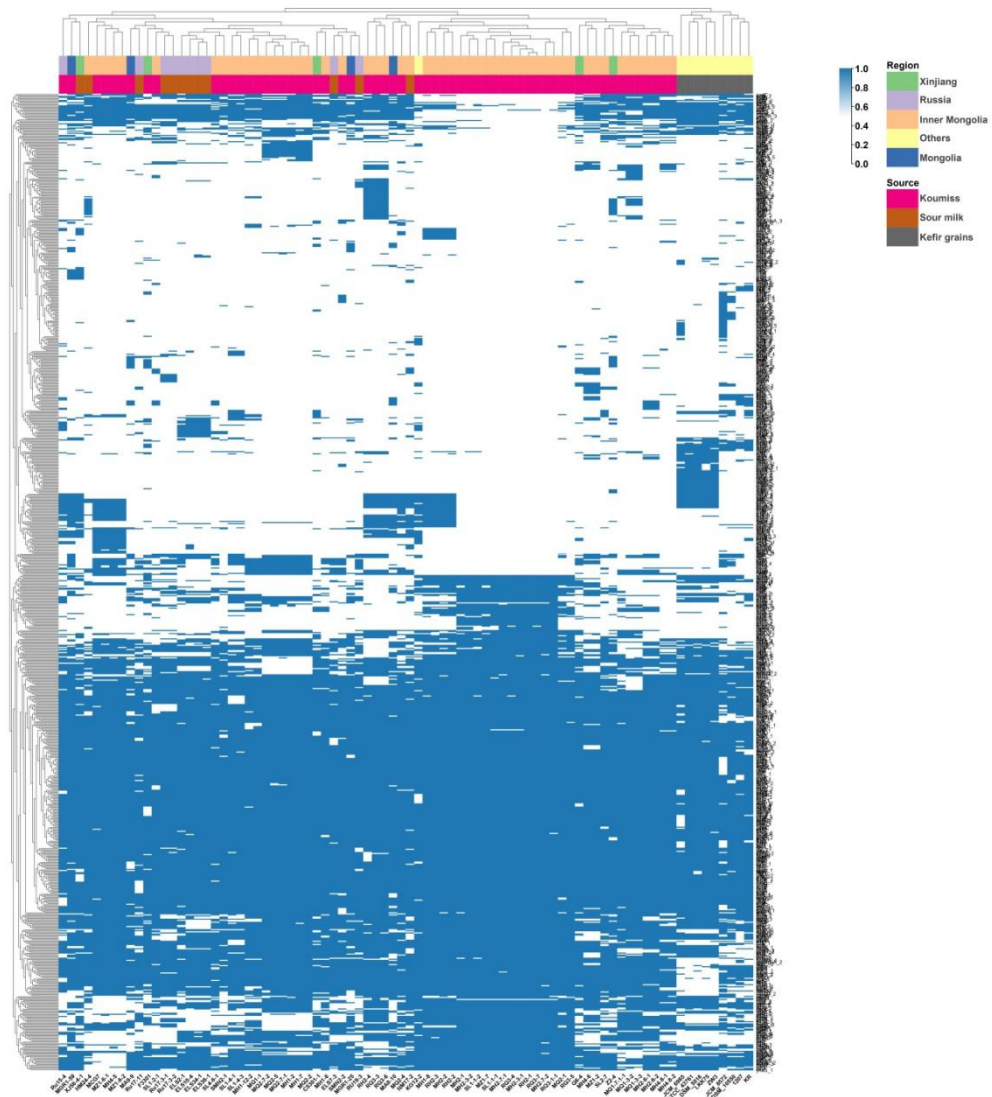

**Figure S3.** Presence and absence of accessory genes in 82 strains of *L. kefiranofaciens*.
